# Supplementary material for: A study on platinum(iv) species containing an estrogen receptor modulator to reverse tamoxifen resistance of breast cancer
Source: Royal Society of Chemistry journal article supplement (doi:10.1039/c7mt00289k), 2017-12-19
Supplement: c7mt00289k1.pdf [file c7mt00289k1.pdf]

## Supplementary Information

### Study on Platinum(IV) Species Containing an Estrogen Receptor Modulator to Reverse Tamoxifen Resistance of Breast Cancer

*Weiwei Hu,<sup>a,b,†</sup> Jian Zhao,<sup>a,b,†</sup> Wuyang Hua,<sup>a</sup> and Shaohua Gou<sup>a,b,\*</sup>*

<sup>a</sup>Pharmaceutical Research Center and School of Chemistry and Chemical Engineering, Southeast University, Nanjing 211189, China

<sup>b</sup>Jiangsu Province Hi-Tech Key Laboratory for Bio-medical Research, Southeast University, Nanjing 211189, China

---

<sup>†</sup>Co-first author: These authors contributed equally to this work.

<sup>\*</sup>Corresponding author. E-mail: sgou@seu.edu.cn (Shaohua Gou).

## Content of Supplementary Information

|                                                               |   |
|---------------------------------------------------------------|---|
| Characterization of the compounds.....                        | 2 |
| The stability of complex <b>1</b> in cell culture medium..... | 9 |

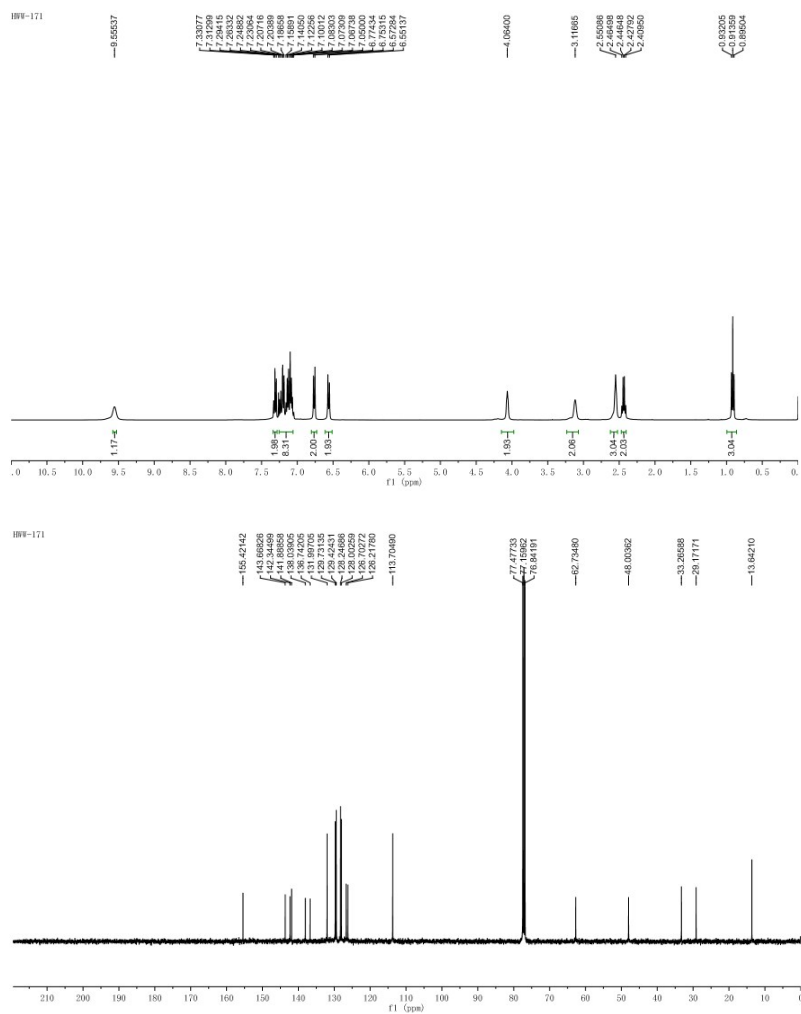

**Figures S1.**  $^1\text{H}$  and  $^{13}\text{C}$  NMR spectra of N-desmethyltamoxifen.

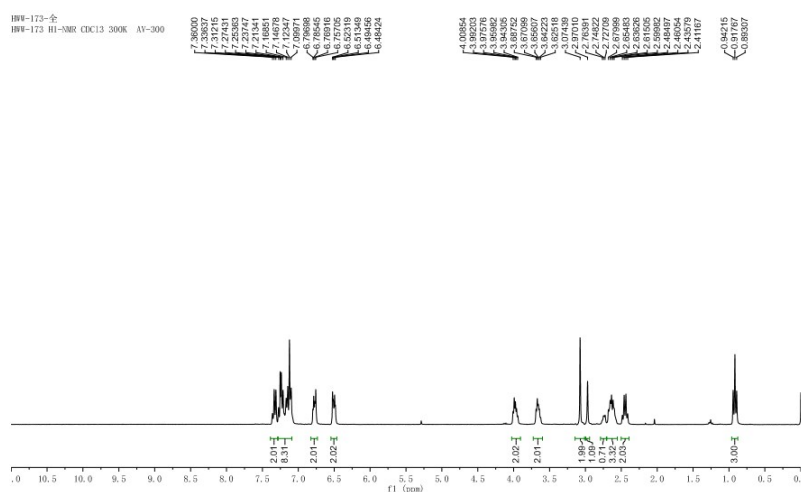

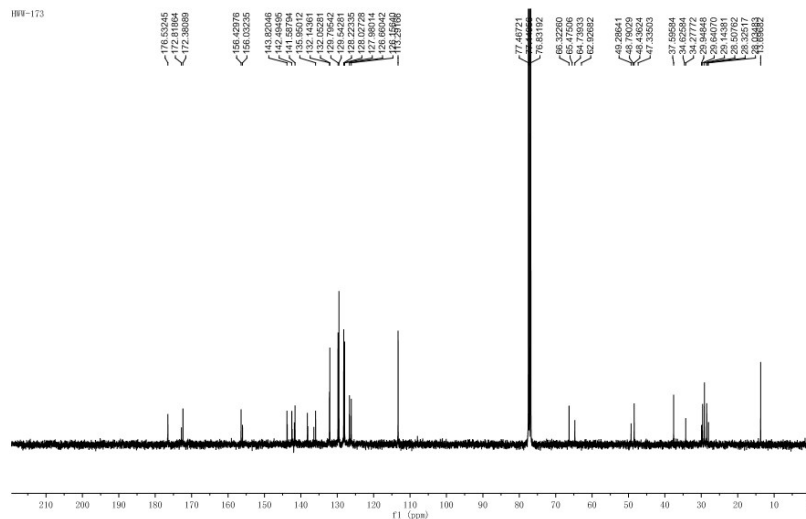

**Figures S2.**  $^1\text{H}$  and  $^{13}\text{C}$  NMR spectra of N-desmethyldamoxifen-succinic acid.

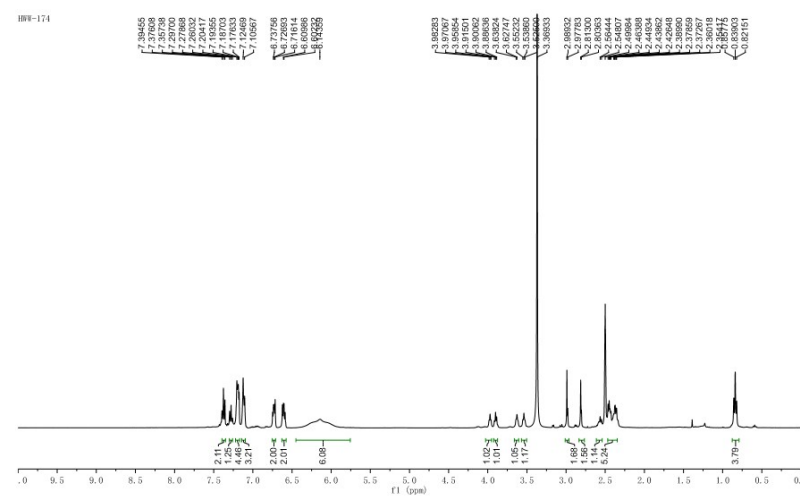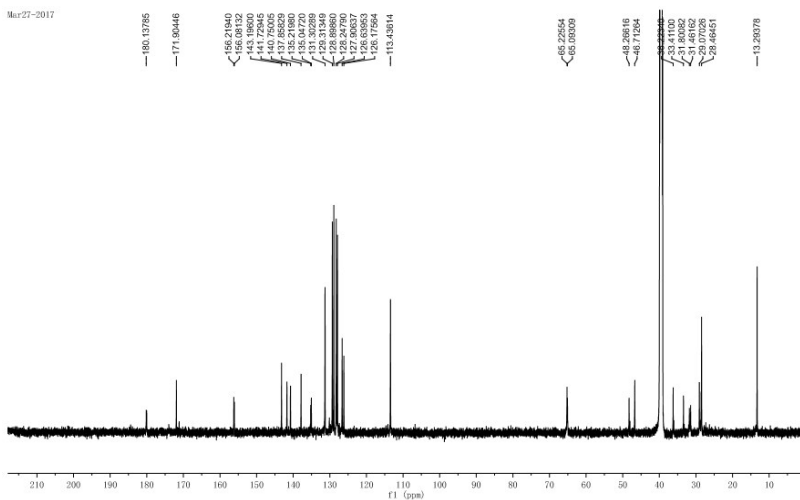

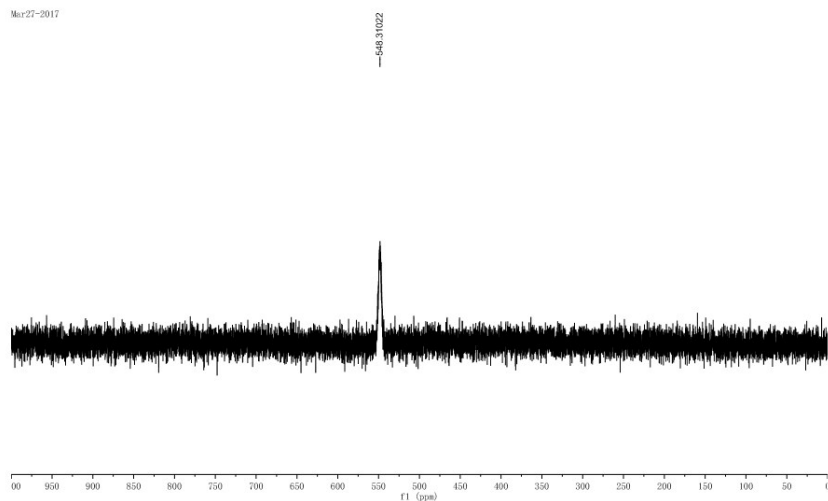

**Figures S3.**  $^1\text{H}$ ,  $^{13}\text{C}$  and  $^{195}\text{Pt}$  NMR spectra of complex **1**.

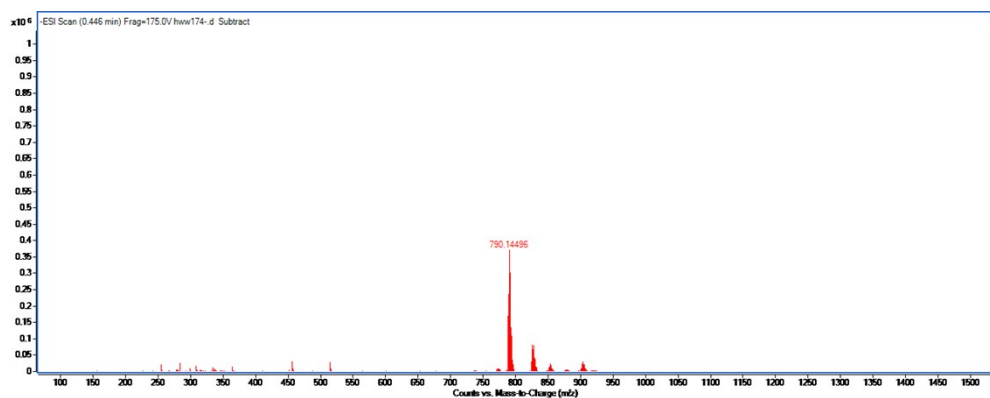

**Figure S4.** ESI-HRMS of complex **1** measured in the negative mode. The measured  $m/z$  is 790.1450 and the calculated  $m/z$  is 790.1419.

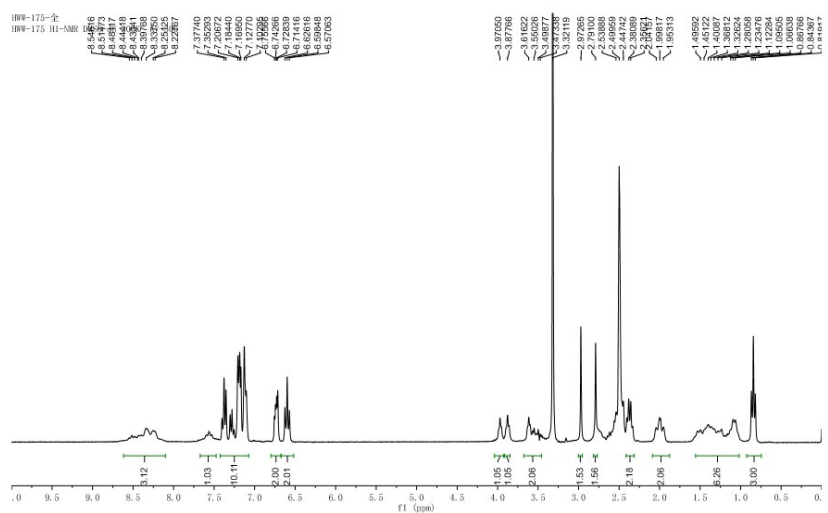

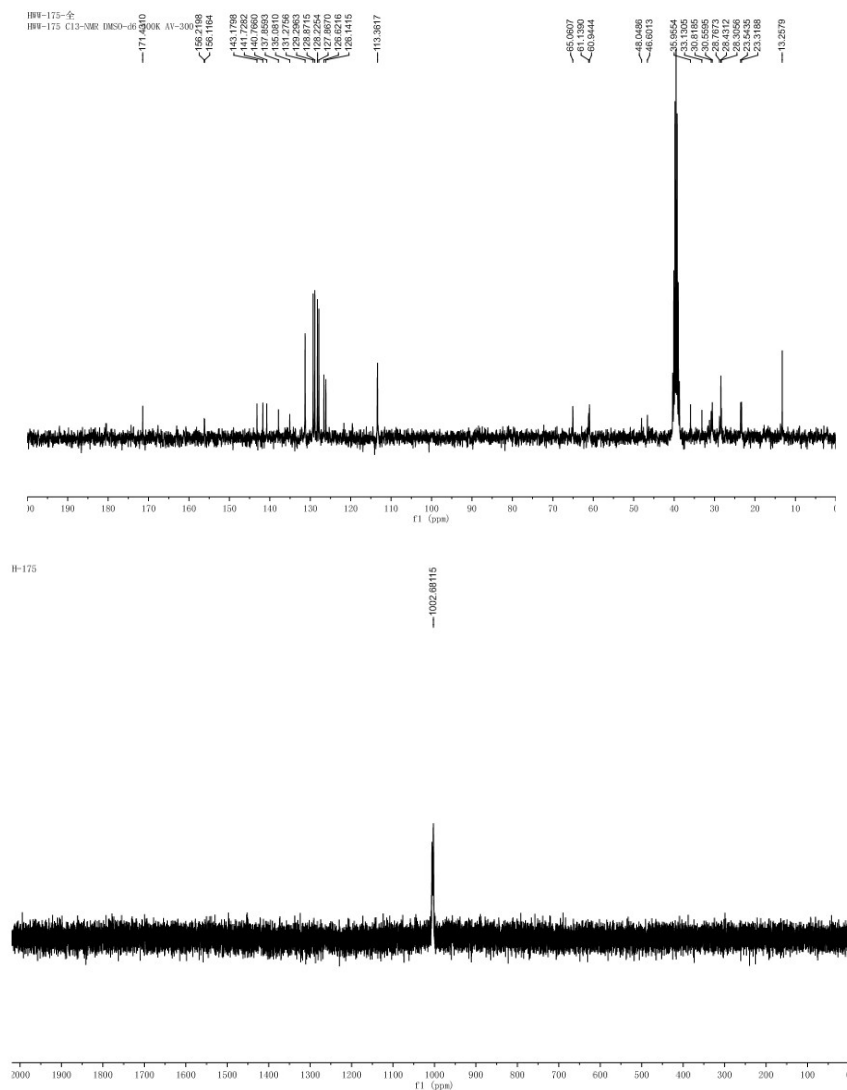

**Figures S5.**  $^1\text{H}$ ,  $^{13}\text{C}$  and  $^{195}\text{Pt}$  NMR spectra of complex **2**.

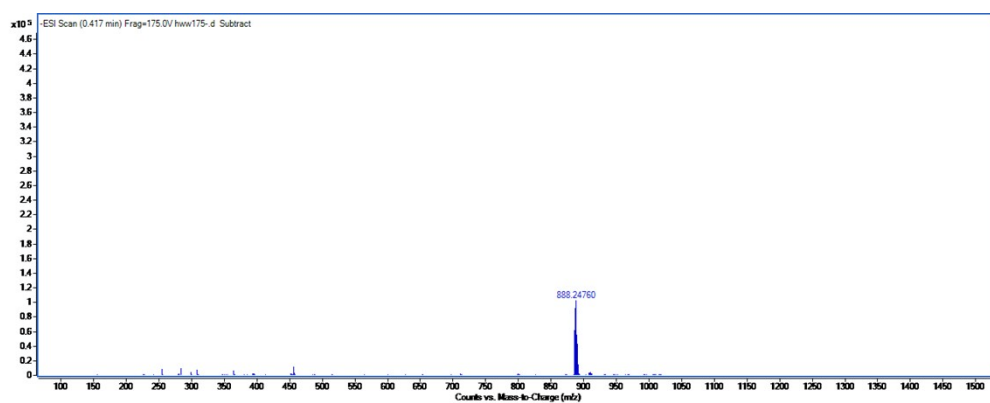

**Figure S6.** ESI-HRMS of complex **2** measured in the negative mode. The measured  $m/z$  is 888.2476 and the calculated  $m/z$  is 888.2465.

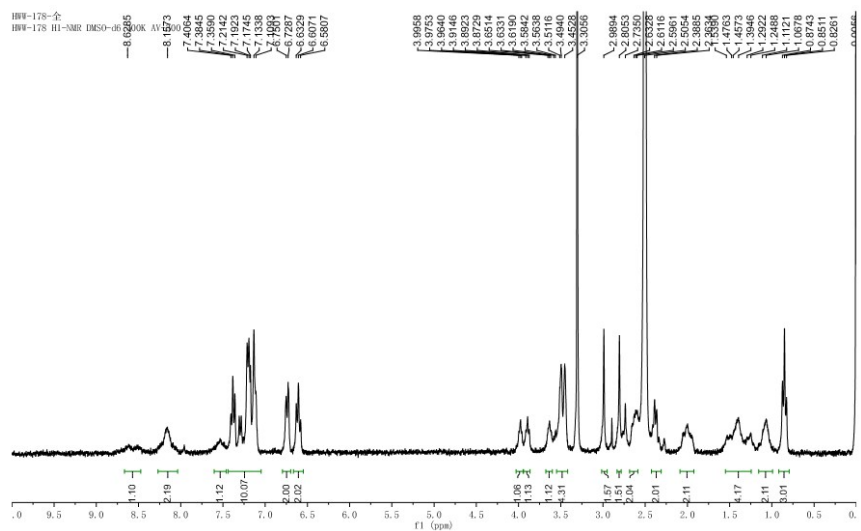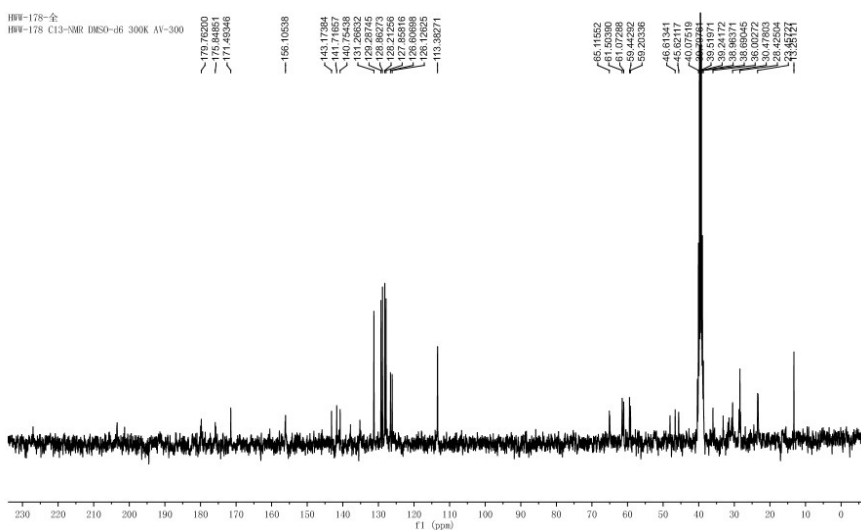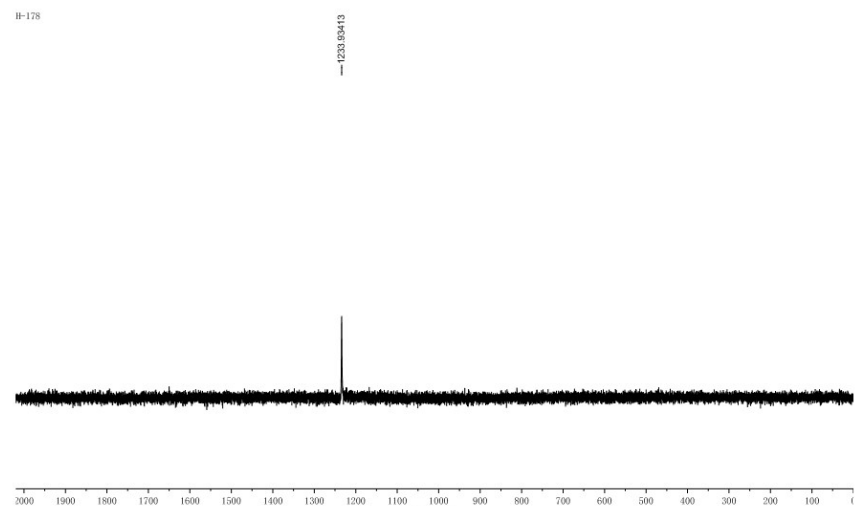

**Figures S7.** <sup>1</sup>H, <sup>13</sup>C and <sup>195</sup>Pt NMR spectra of complex **3**.

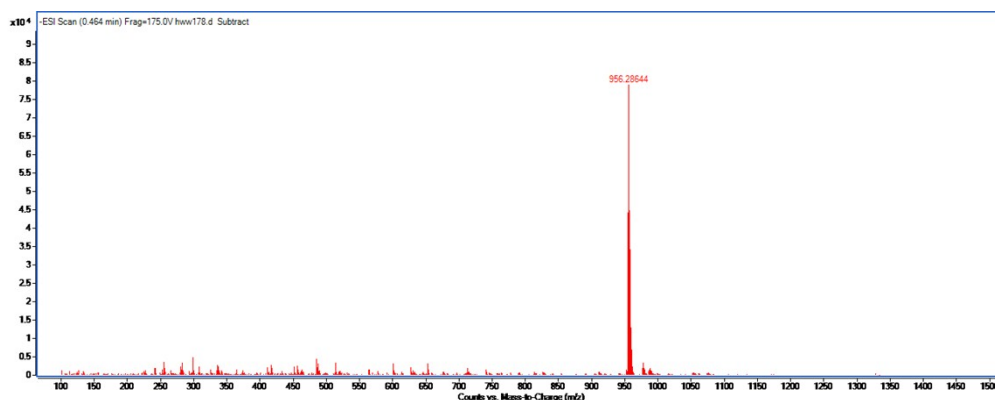

**Figure S8.** ESI-HRMS of complex **3** measured in the negative mode. The measured  $m/z$  is 956.2864 and the calculated  $m/z$  is 956.2727.

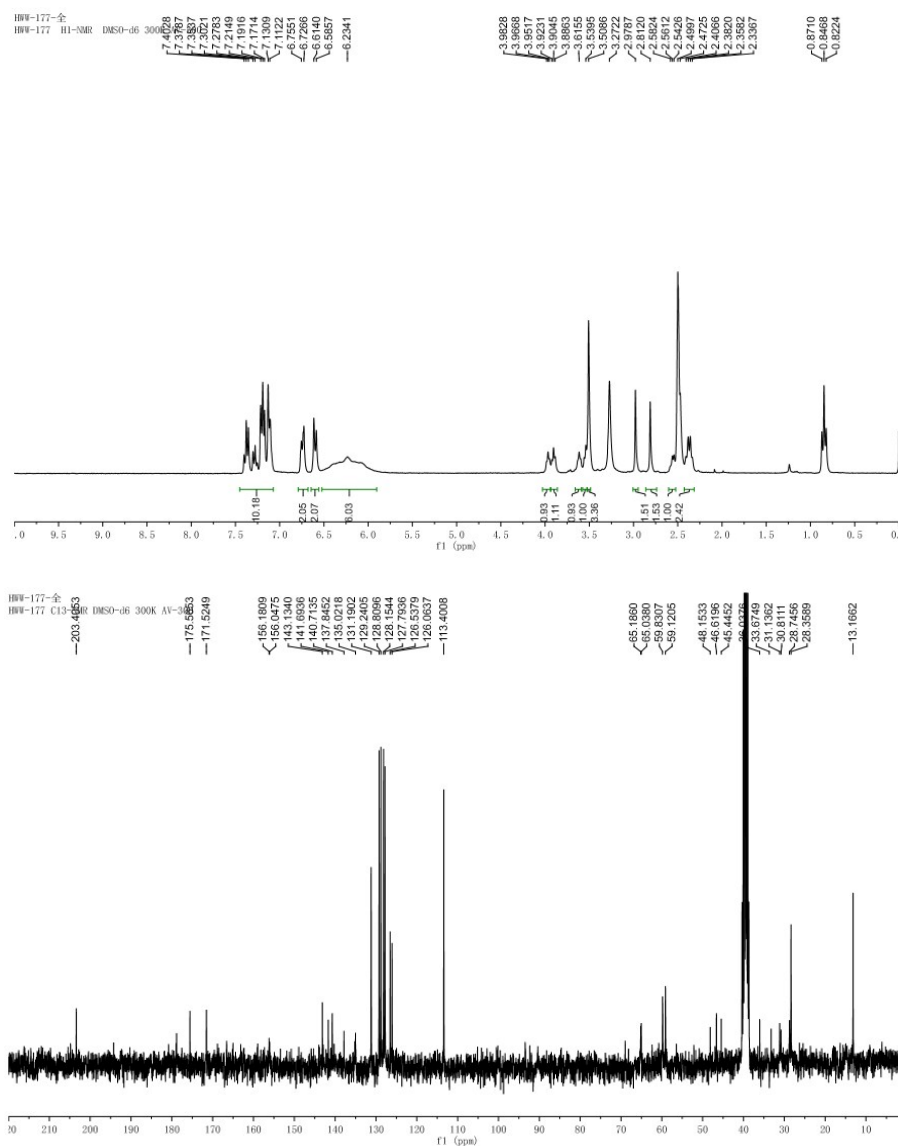



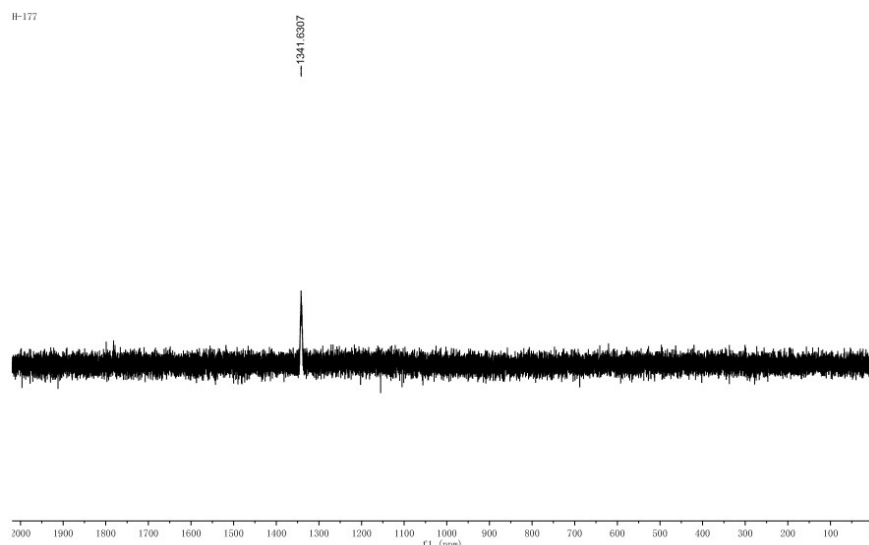

**Figures S9.**  $^1\text{H}$ ,  $^{13}\text{C}$  and  $^{195}\text{Pt}$  NMR spectra of complex **4**.

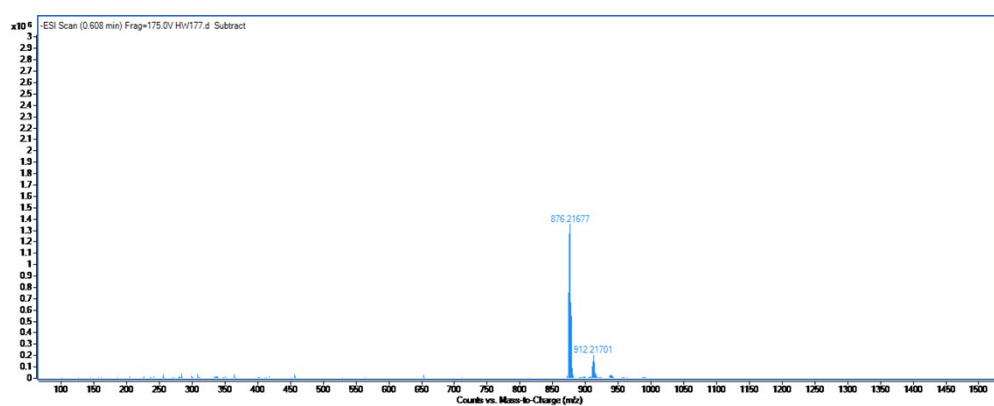

**Figure S10.** ESI-HRMS of complex **4** measured in the negative mode. The measured  $m/z$  is 876.2168 and the calculated  $m/z$  is 876.2101.

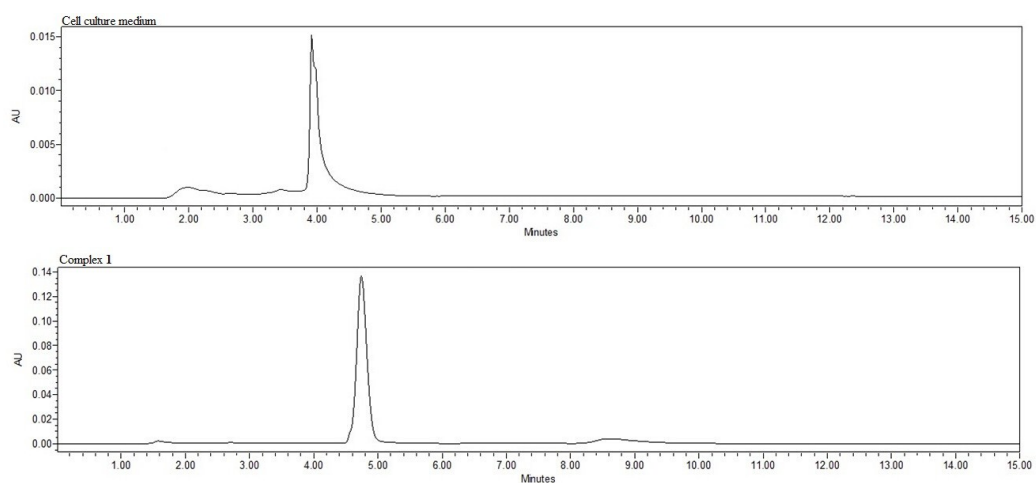

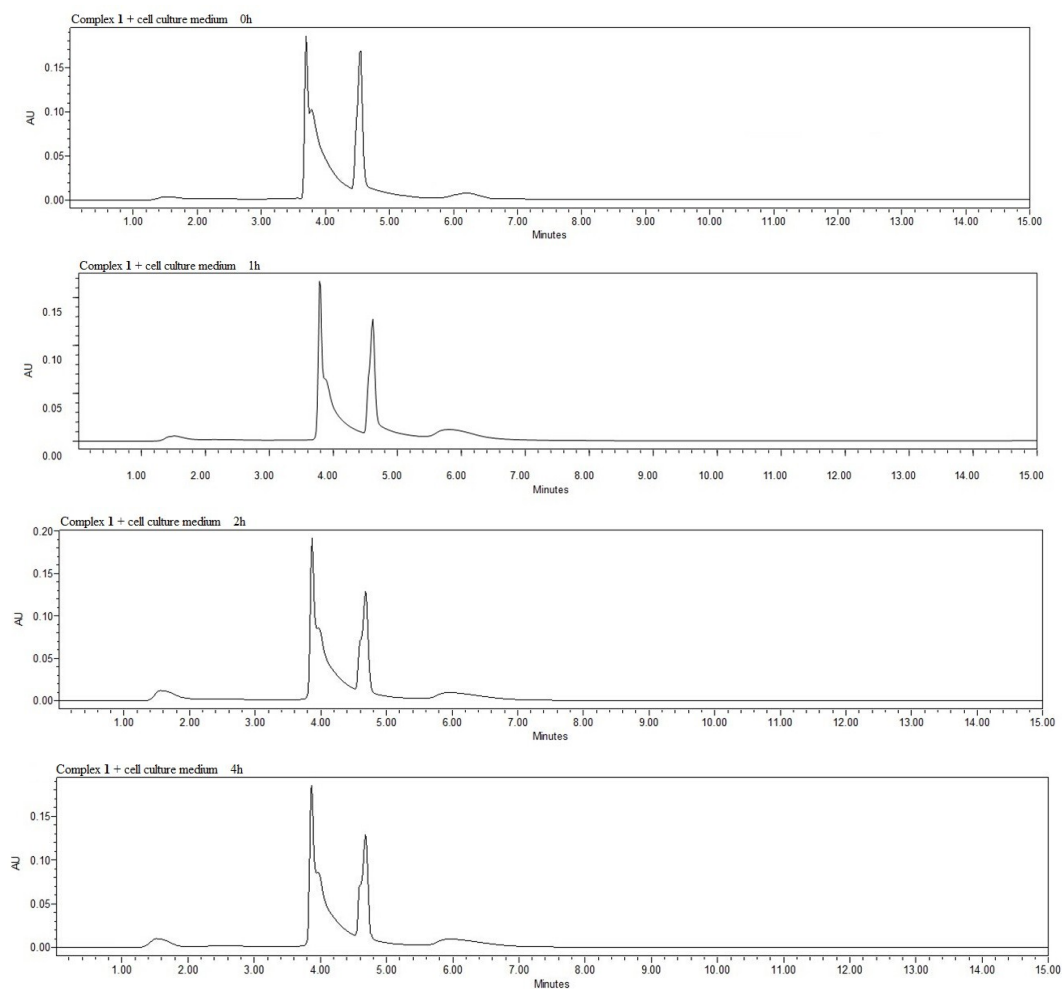

**Figure S11.** The stability of complex 1 in cell culture medium was studied by HPLC. Mobile phase consisted of acetonitrile/water (9:1, v/v), and flow rate was 1.0 mL/min. The wavelength used on UV detection at 249 nm.
